# Supplementary material
Source: publisher site journal article supplement (https://www.dovepress.com/article/521079)
Supplement: Supplementary file 1 [file 521079%20Revised%20Supplementary%20Material.docx]

Supplemental Materials

**Supplemental Methods**

**Propensity score matching**

PSM is a quasi-experimental method to construct an artificial control group by matching each treated (control) observation with a control (treated) observation. Two binary populations were used within this analysis for the PSM models: patients in the treatment personalization group were matched to those with no treatment personalization, and patients in the PK-TT group were matched to those in the TT only group.

PSM computes the probability, based on key observed characteristics, that a patient will have treatment personalisation (‘treated’), generating the propensity score (PS). Then, treated observations are matched to controls, and vice-versa, based on the propensity score. PSM relies on the assumption that, conditional on some observable characteristics, control patients can be compared with treated patients, similar to cohorts in which the treatment has been randomized.

To assess potential treatment effects of treatment personalisation on the outcomes of interest (sport and total activity), a logistic regression model was specified (one for each outcome of interest) to estimate the propensity score of being treated (patients with any treatment personalisation and patients with PK-guided treatment personalisation) for all individuals based on a set of observed covariates with no interaction terms.

Matching covariates were selected based on the results of the univariate and multivariate analysis and established clinical relevance physical activity and accepted disease understanding. It is generally considered reasonable to include variables related to both the outcome of interest and to the assignment of treatment if the sample is large, while it is advisable to concentrate on variables believed to be strongly related to the outcome if the sample is small.1 Therefore for this analysis, variables that are related to the outcome, regardless of whether they are related to exposure, were included in the model, as the goal of a PS model is to match patients with comparable clinical profiles and general characteristics.2,3

All patients belonging to the treatment group were then matched to the observation with the closest PS (i.e. with a similar probability of being treated) in the control group and vice versa (i.e. each observation in the treatment group was matched with one observation in the control group and each observation in the control group was matched to one observation in the treatment group). This balances the sample across treated and control groups, observing the difference in the outcome of interest, allowing for an unbiased estimate of the treatment effect (ATE and ATT). In a randomised controlled trial, randomisation ensures that ATE and ATT are not substantially different because the treated population does not differ, on average, from the overall study population.4

Matching was performed with replacement, which allows controls to be used as matches for more than one treated individual (or more than one treated individual to be used as a match for more than one control individual). This is advantageous when there are few controls compared with the treated individuals, as it often contributes to reducing bias in the estimation of treatment effects.5,6 As matching was performed with replacement, the proportion of unmatched control observations are reported for each of the models.

**PSM sensitivity analysis**

Balance plots, which allow for visual comparisons between the unmatched and matched populations in order to assess the quality of the matching process, are based on the propensity scores estimated for the treated and control group. They quantify graphically how balanced the estimated propensity score is between the two groups, pre and post matching. Remaining uncertainty sensitivity to an unobserved variable was assessed using Rosenbaum bounds, which examine how strong the correlations would have to be between a hypothetical unobserved covariate and both treatment assignment to render the observed treatment effect null. Specifically, Rosenbaum bounds identify the threshold at which hidden bias through an unobserved covariate would affect the statistical significance of the ATT, via Wilcoxon signed rank tests performed at increasing levels of hypothetical hidden bias.7,8 In this context, hidden bias is represented by the odds ratio of differential treatment assignment due to an unobserved covariate, refered to as gamma values. Higher gamma values indicate greater tolerance to unmeasured confounding, implying that the observed treatment effect is robust against potential hidden biases.

**TABLE S1. Pre and post matching characteristics across treatment personalization.**

| **Characteristic** | **Pre matching** | | **Post matching** | | **Pre matching** | | **Post matching** | |
| --- | --- | --- | --- | --- | --- | --- | --- | --- |
| **Personalized treatment** | | **Personalized treatment** | | **PK guidance** | | **PK guidance** | |
| **No**  **N=21** | **Yes**  **N=32** | **No**  **N=53** | **Yes**  **N=53** | **Non-PK-guided N=22** | **PK-guided N=10** | **Non-PK-guided N=32** | **PK-guided N=32** |
| **Age,** median (IQR)  mean (SD) | 35.0 (27.0–45.0)  36.7 (13.1) | 29.5 (24.0–47.0)  36.1 (15.3) | 31.0 (21.0–36.0)  32.3 (11.7) | 29.0 (23.0–43.0)  34.5 (14.6) | 27.5 (23.0–45.0)  34.4 (14.9) | 37.0 (28.0–49.0)  39.8 (16.4) | 26.0 (22.0–41.5)  32.3 (13.5) | 32.5 (28.0–39.0)  36.4 (13.6) |
| **BMI,** median (IQR)  mean (SD) | 25.2 (23.1–25.6)  24.6 (1.8) | 23.6 (22.0–26.5)  24.2 (2.6) | 25.2 (23.1–25.6)  24.5 (1.7) | 23.7 (22.2–26.3)  24.4 (2.5) | 22.8 (21.3–26.7)  24.0 (2.9) | 25.3 (23.4–26.2)  24.8 (1.8) | 23.5 (22.2–26.7)  24.3 (2.7) | 23.4 (23.4–25.6)  24.2 (1.6) |
| **ABR,**  median (IQR)  mean (SD) | 5.0 (2.0–6.0) 4.9 (3.9) | 4.0 (3.0–7.5) 4.7 (3.0) | 5.0 (2.0–6.0) 4.9 (3.4) | 4.0 (3.0–6.0) 4.4 (2.8) | 4.0 (3.0–8.0) 5.2 (3.0) | 3.5 (2.0–4.0) 3.6 (2.8) | 4.0 (2.5–7.5) 4.5 (2.9) | 4.0 (2.5–4.0) 3.5 (2.2) |
| **Target joints,** median (IQR) mean (SD) | 0.0 (0.0–1.0) 0.7 (1.0) | 1.0 (0.0–2.5) 1.5 (1.6) | 0.0 (0.0–1.0) 0.5 (0.8) | 1.0 (0.0–2.0) 1.5 (1.6) | 1.5 (0.0–3.0) 1.9 (1.8) | 0.5 (0.0–1.0) 0.6 (0.7) | 1.0 (0.0–3.5) 1.9 (1.9) | 0.0 (0.0–1.0) 0.4 (0.7) |
| **Problem joints,** median (IQR) mean (SD) | 0.0 (0.0–2.0) 1.0 (1.2) | 1.0 (0.0–1.0) 0.9 (1.1) | 1.0 (0.0–2.0) 1.2 (1.2) | 1.0 (0.0–1.0) 0.9 (1.1) | 1.0 (0.0–1.0) 0.8 (1.1) | 1.0 (0.0–2.0) 1.0 (1.1) | 1.0 (0.0–1.0) 0.7 (1.0) | 1.0 (0.0–1.5) 1.0 (0.8) |
| **University Education,** n (%) | | | | | | | | |
| No University Education | 12 (57.1%) | 21 (65.6%) | 34 (64.2%) | 34 (64.2%) | 15 (68.2%) | 6 (60.0%) | 22 (68.8%) | 14 (43.8%) |
| University Education | 9 (42.9%) | 11 (34.4%) | 19 (35.8%) | 19 (35.8%) | 7 (31.8%) | 4 (40.0%) | 10 (31.2%) | 18 (56.2%) |
| **Patient reported adherence,** median (IQR) mean (SD) | 9.0 (8.0–10.0) 9.0 (1.3) | 9.5 (7.6–10.0) 8.8 (1.5) | 10.0 (9.0–10.0) 9.1 (1.3) | 9.0 (7.0–10.0) 8.7 (1.5) | 9.6 (7.0–10.0) 8.7 (1.6) | 9.5 (8.0–10.0) 9.0 (1.2) | 9.0 (7.0–10.0) 8.6 (1.6) | 8.0 (8.0–10.0) 8.5 (1.2) |
| **Chronic pain,** n (%) | | | | | | | | |
| None | 5 (23.8%) | 10 (31.2%) | 13 (24.5%) | 13 (24.5%) | 7 (31.8%) | 3 (30.0%) | 9 (28.1%) | 7 (21.9%) |
| Mild | 6 (28.6%) | 7 (21.9%) | 10 (18.9%) | 13 (24.5%) | 4 (18.2%) | 3 (30.0%) | 6 (18.8%) | 4 (12.5%) |
| Moderate | 8 (38.1%) | 13 (40.6%) | 26 (49.1%) | 22 (41.5%) | 10 (45.5%) | 3 (30.0%) | 13 (40.6%) | 20 (62.5%) |
| Severe | 2 (9.5%) | 2 (6.2%) | 4 (7.5%) | 5 (9.4%) | 1 (4.5%) | 1 (10.0%) | 4 (12.5%) | 1 (3.1%) |
| **SAT (hours per month),** median (IQR)  mean (SD) | 1.7 (0.7–3.0)  3.2 (4.0) | 3.3 (1.8–6.2)  7.6 (12.0) | 1.7 (0.5–3.0)  2.7 (3.6) | 4.0 (2.0–5.3)  7.6 (11.4) | 3.0 (1.3–5.3)  6.0 (10.8) | 4.0 (3.0–20.0) 11.3 (14.3) | 3.2 (1.3–5.3)  5.2 (9.1) | 5.0 (2.8–45.0) 20.0 (19.6) |

*ABR, annual bleed rate; BMI, body mass index; IQR, interquartile range; PK, pharmacokinetic; SAT, sport active time; SD, standard deviation*

**References**

1. Benedetto U, Head SJ, Angelini GD, Blackstone EH. Statistical primer: propensity score matching and its alternatives. *Eur J Cardiothorac Surg.* 2018;53(6):1112-1117.

2. Brookhart MA, Schneeweiss S, Rothman KJ, Glynn RJ, Avorn J, Stürmer T. Variable selection for propensity score models. *Am J Epidemiol.* 2006;163(12):1149-1156.

3. Rubin DB, Thomas N. Matching using estimated propensity scores: relating theory to practice. *Biometrics.* 1996;52(1):249-264.

4. Austin PC. An Introduction to Propensity Score Methods for Reducing the Effects of Confounding in Observational Studies. *Multivariate Behav Res.* 2011;46(3):399-424.

5. Dehejia RH, Wahba S. Causal Effects in Nonexperimental Studies: Reevaluating the Evaluation of Training Programs. *J Am Stat Assoc.* 1999;94:1053-1062.

6. Stuart EA. Matching methods for causal inference: A review and a look forward. *Stat Sci.* 2010;25(1):1-21.

7. DiPrete TA, Gangl M. 7. Assessing Bias in the Estimation of Causal Effects: Rosenbaum Bounds on Matching Estimators and Instrumental Variables Estimation with Imperfect Instruments. *Sociol Methodol.* 2004;34:271-310.

8. Becker SO, Caliendo M. Sensitivity analysis for average treatment effects. *Stata J.* 2007;7:71-83.
